# Supplementary material for: ZnO nanorods/Pt and ZnO nanorods/Ag heteronanostructure arrays with enhanced photocatalytic degradation of dyes
Source: Royal Society of Chemistry journal article supplement (doi:10.1039/c4ra10753e), 2014-10-23
Supplement: c4ra10753e1.pdf [file c4ra10753e1.pdf]

## Supporting Information

### **ZnO Nanorods/Pt and ZnO Nanorods/Ag Heteronanostructure Arrays with Enhanced Photocatalytic Degradation of Dyes**

Zhengcui Wu,<sup>\*a</sup> Yejing Xue,<sup>a</sup> Huan Wang,<sup>a</sup> Yaqin Wu<sup>a</sup> and Hao Yu<sup>a</sup>

Anhui Key Laboratory of Molecule-Based Materials, The Key Laboratory of Functional Molecular  
Solids, Ministry of Education, College of Chemistry and Materials Science, Anhui Normal  
University, Wuhu 241000, People's Republic of China

\* E-mail: zhengcui@mail.ahnu.edu.cn; Tel.: +86-553-3869302; Fax: +86-553-3869302.

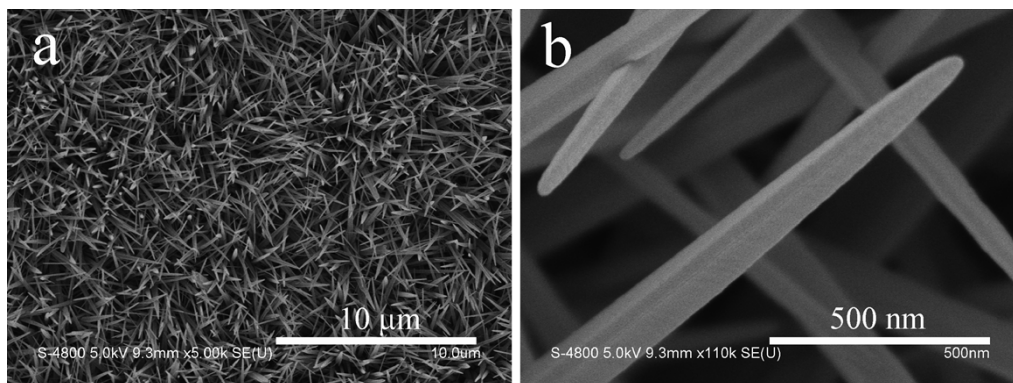

**Fig. S1** Low- and high-magnification FESEM images of the needle-like ZnO-NRs array on zinc foil.

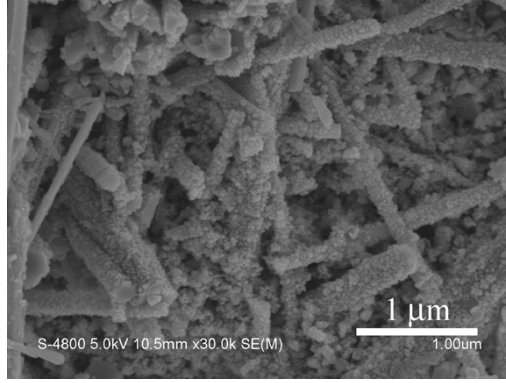

**Fig. S2** FESEM image of the ZnO-NRs/Ag-NPs sample synthesized without the zinc substrate.

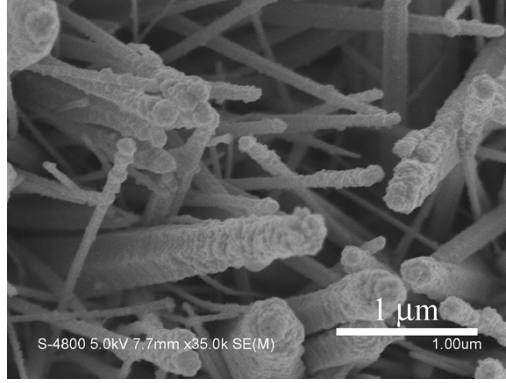

**Fig. S3** FESEM image of the ZnO-NRs/Pt-NPs product synthesized without addition of 1, 6-hexanediamine.

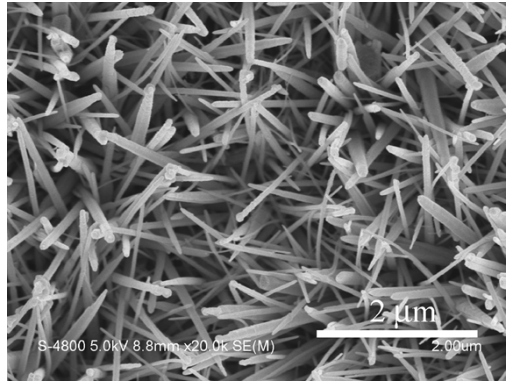

**Fig. S4** FESEM image of the ZnO nanorods synthesized without addition of  $\text{H}_2\text{PtCl}_6$  solution in the second reaction step.

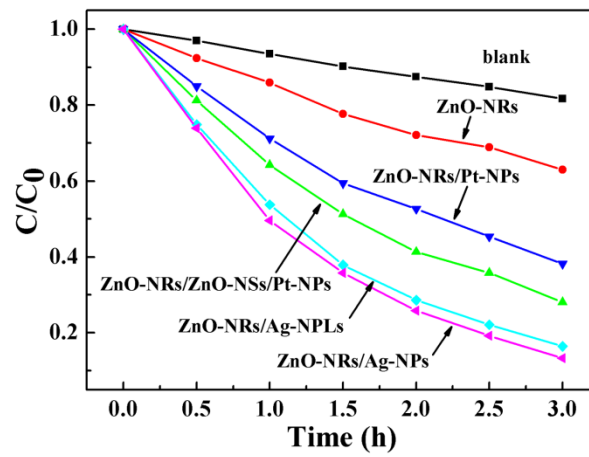

**Fig. S5** RhB photodegradation curves of  $C/C_0$  versus time by ZnO-NRs/Pt, ZnO-NRs/Ag hetero-nanostructure arrays and pure ZnO-NRs array as well as the blank under visible light irradiation.

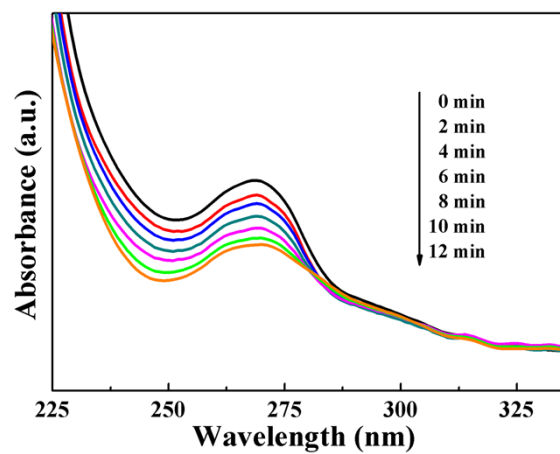

**Fig. S6** UV-visible absorption spectra of photodegradation phenol aqueous solution with ZnO-NRs/Ag-NPs heterostructure array.

**Table S1** Cycling results of photocatalytic degradation of RhB with ZnO-NRs/Ag-NPs, ZnO-NRs/ZnO-NSs/Pt-NPs heterostructure arrays and pure ZnO-NRs array.

| Sample (Decolorization) | Cycle Number |       |       |       |       |
|-------------------------|--------------|-------|-------|-------|-------|
|                         | 1            | 2     | 3     | 4     | 5     |
| ZnO-NRs/Ag-NPs          | 96.8%        | 96.5% | 96.1% | 95.7% | 95.1% |
| ZnO-NRs/ZnO-NSs/Pt-NPs  | 90.6%        | 90.3% | 90.1% | 89.8% | 89.5% |
| ZnO-NRs                 | 68.7%        | 60.3% | 51.2% | —     | —     |
